# Supplementary material for: Association of Polymorphisms in HLA Antigen Presentation-Related Genes with the Outcomes of HCV Infection
Source: PubMed Central journal article supplement (PMC4395248; doi:10.1371/journal.pone.0123513), 2015-04-13
Supplement: pone.0123513.s003.pdf [file pone.0123513.s003.pdf]

**S1 Table. Information of primers and probes for TaqMan allelic discrimination**

| <b>Polymorphism</b>  |        | <b>Sequence(5'-3')</b>                                              |
|----------------------|--------|---------------------------------------------------------------------|
| <i>DMA</i> rs1050391 | Primer | F: AGGTCTTCTTCCAGGCAAGGA<br>R: GAGCTATAGACAGGAAGTGCTGAA             |
|                      | Probe  | FAM-CTAGACGTAGAAGCAG-MGB<br>HEX-AGCTAGACATAGAAGCAGA-MGB             |
|                      | Primer | F: CCACCCATGCTGACAGTGA<br>R: AGTCCATCGACAGCTGAGACA                  |
| <i>DMA</i> rs1063478 | Probe  | FAM-ATCATTCCGTCCTGTG-MGB<br>HEX-CATCATTCCATCCCTGT-MGB               |
|                      | Primer | F: TCGCTTGGGTGTTCCCTGTATAA<br>R: CAGGGCCCACGTGATCTG                 |
|                      | Probe  | FAM-TAAGCTACAAATTCTGGCA-MGB<br>HEX-ATAAGCTACAAATTCGGGCAA-MGB        |
| <i>DMB</i> rs23544   | Primer | F: CCACTGTATTAGAGAGGACCTGGAA<br>R: ACCACCCACTCCCAAGAAAAT            |
|                      | Probe  | FAM-AGATGGATTCCCC-MGB<br>HEX-AGATGGGTTCCCC-MGB                      |
|                      | Primer | F: GTTGAAATCTAAGGAGGCTAGAATAGTGTA<br>R: GGAGCGTGCTTGCTTTGAA         |
| <i>DMB</i> rs2071556 | Probe  | FAM-ATTGCCAAATTTACAGCC-MGB<br>HEX-TGCCAAATTTACATCCT-MGB             |
|                      | Primer | F: CCAGGCCTTGCCAGTT<br>R: GTAACACACAATGGGCCAAATG                    |
|                      | Probe  | FAM-TTGGCAGCCGTCCT-MGB<br>HEX-ATTGGCAGCCATC-MGB                     |
| <i>DOA</i> rs408036  | Primer | F: TGTCGGGTGGACATGTTTAC<br>R: GGATCCACATGGTCTGTGTTCTC               |
|                      | Probe  | FAM-AGAACACCGCTAACA-MGB<br>HEX-AGAACACCGCCAACA-MGB                  |
|                      | Primer | F: AAAACATACAAAGAGATAAATCACCATAACC<br>R: TGAAAACCGTAATCTGTATTGCTCAT |
| <i>DOA</i> rs3128935 | Probe  | FAM-CATAGTTTATGTCAGGACC-MGB<br>HEX-CATAGTTTATGTCAAGACC-MGB          |
|                      | Primer | F: CTTGGCTGTGGTCTGGTAACTG<br>R: CCTTCCTAGTCCACCTCAGACCTT            |
|                      | Probe  | FAM-TAATCAGGTGCCATTGG-MGB<br>HEX-TAATCAGGTGCCATCGG-MGB              |
| <i>DOA</i> rs376892  | Primer | F: GAAAGAAAGGAACAGGGCATGAC<br>R: GGC GGGAAGGTCCAGAGA                |
|                      | Probe  | FAM-TGATGGGAACCTAGG-MGB<br>HEX-TGATGGGAGCCTAGG-MGB                  |
|                      | Primer | F: GGTGCGGGTCTACAGATGGTT<br>R: GAGCAACAGTTATTGAGGAACTAGCAT          |

---

|                      |        |                                                                  |
|----------------------|--------|------------------------------------------------------------------|
|                      | Probe  | FAM-TGGCCCCCATTG-MGB<br>HEX-TGGCCCACCATTG-MGB                    |
|                      | Primer | F: TCCTCCATCTCAGAGCATTATGAC<br>R: TGTTGCTCAAACAACCTTCATAGAGTTC   |
| <i>DOA</i> rs2284191 | Probe  | FAM-CTTCCATAACTGTTGTCTAG-MGB<br>HEX-TAACTGTTATCTAGTTTTCTGG-MGB   |
|                      | Primer | F: GTCCTGTTTCAGAGTCATCCACTTT<br>R: TCCTCATCATCATGGGCACAT         |
| <i>DOA</i> rs6913008 | Probe  | FAM-CCCAGACTCCCGG-MGB<br>HEX-CCCAGACTCCTGG-MGB                   |
|                      | Primer | F: TGATCCTTCTGAGAGAAATGACTTGT<br>R: CACAGCGGGATGCACTTAAA         |
| <i>DOA</i> rs2582    | Probe  | FAM-TGTGACAGACCCTGC-MGB<br>HEX-TGTGACAGCCCCTG-MGB                |
|                      | Primer | F: CAGCCTGGTGACAGAGTGAGA<br>R: TCACCCAGACCTACTGAATTAGAATCT       |
| <i>DOA</i> rs416622  | Probe  | FAM-AGACAGCCCCCTGT-MGB<br>HEX-AGACAGCCTCCCTGTT-MGB               |
|                      | Primer | F: GTCACCCGTGGAGGCACTA<br>R: AACGTCCCTTAATCCCAGTCCTA             |
| <i>DOA</i> rs453779  | Probe  | FAM-AGGAACAGGCCCTG-MGB<br>HEX-AGGAACGGGCCCTG-MGB                 |
|                      | Primer | F: TCACACAAAGAGGGTTTCTGTTACTG<br>R: GAATAAGTTGAAATCAATGACCAGAAGA |
| <i>DOA</i> rs1044429 | Probe  | FAM-TGAGATGATTCTCCTCCAC-MGB<br>HEX-TGAGATGATTTTCTCCTCCAC-MGB     |
|                      | Primer | F: TCTCTTGCCTCCGTTCTCATTC<br>R: TGCTACATATTTCTAAAAGCCACTCTCATA   |
| <i>DOB</i> rs2857111 | Probe  | FAM-TCCCCTCCCTGGAGA-MGB<br>HEX-CTCCCCTCCCTAGAG-MGB               |
|                      | Primer | F: CAAGGGCATTGTCCAGAAACTC<br>R: GCTGGACCACAGAAAAGTAAATGA         |
| <i>DOB</i> rs11244   | Probe  | FAM-ACTCCTTCCAGTCCCA-MGB<br>HEX-CTCCTTCCAGCCCCA-MGB              |
|                      | Primer | F: TTACCAGACACGTTTAGAATGGATTC<br>R: GAGTTCACAGCACATTGTAATTATTGG  |
| <i>DOB</i> rs1383258 | Probe  | FAM-AGAAGAGATGAGAGAGTC-MGB<br>HEX-CAAGAGAAGAGACGAGAG-MGB         |
|                      | Primer | F: GAAGCCAGAAAAACAGCGATTTAT<br>R: AGGGGACCCACCCAGAAC             |
| <i>DOB</i> rs2071469 | Probe  | FAM-TGAATTTTATGAACTCATTC-MGB<br>HEX-TGAATTTTATGAGCTCATTC-MGB     |
| <i>DOB</i> rs2071472 | Primer | F: GACTGGATTCCTCCATGACTCAA<br>R: CATGCCAATTCTTGCATACACA          |

---

---

|                          |        |                                                                         |
|--------------------------|--------|-------------------------------------------------------------------------|
|                          | Probe  | FAM-AACAGAGCAATTGTT-MGB<br>HEX-AACAGAGCAATTATT-MGB                      |
| <i>DOB</i> rs7383287     | Primer | F: CGTAATTTACCAGGCATGGGTTT<br>R: CAGTCAGCCTTTGCCTGAATC                  |
|                          | Probe  | FAM-TTCCAGAAGATTTG-MGB<br>HEX-TTCCAGAAGACTTTG-MGB                       |
| <i>DOB</i> rs2856997     | Primer | F: CCAAATCCAATGCTAGCTAGAGAAA<br>R: ATGGGCTGTGAGAATCTGTAACC              |
|                          | Probe  | FAM-CATGGAGTTACCCCC-MGB<br>HEX-CCATGGAGTTACCACC-MGB                     |
| <i>DOB</i> rs2071471     | Primer | F: CATGCCAATTCCTGCATACACACT<br>R: GGTGGCTCTGCTAGTGAATCTGA               |
|                          | Probe  | FAM-CTGGAGAATCTGTGC-MGB<br>HEX-CTGGAGAGTCTGTGC-MGB                      |
| <i>DOB</i> rs2071475     | Primer | F: GGCCTCTCTGGGTACACTGTCA<br>R: GGTTTTCTTTCACGGTGTCTCAT                 |
|                          | Probe  | FAM-CTAGGAAGGGAGGAAA-MGB<br>HEX-ACTAGGAAGAGAGGAAA-MGB                   |
| <i>DOB</i> rs2856995     | Primer | F: CTCCCCTCCCTAGAGAATCCA<br>R: AAGAAACAGAATGGGATTCAACAGA                |
|                          | Probe  | FAM-TGTCTGGTATGTCTCTAA-MGB<br>HEX-TGTCTGGTAAGTCTC-MGB                   |
| <i>TAP1</i> rs1135216    | Primer | F: CACACATGTGGCTATACCGTTCTC<br>R: TCGCTGACCCCTGACA                      |
|                          | Probe  | FAM-TGCAGAGGTAGGCG-MGB<br>HEX-TCTGCAGAGGTAGACG-MGB                      |
| <i>TAP2</i> rs1800454    | Primer | F: CCTGGAACGCGCCTTGTA<br>R: CCTTTCACAACCACTCTGGTATCTT                   |
|                          | Probe  | FAM-TGCTCGTAAGGAGG-MGB<br>HEX-CTGCTCATAAGGAGG-MGB                       |
| <i>LMP2</i> rs17587      | Primer | F: TGAACCGAGTGTGTTGACAAGCT<br>R: GCTGAACCAGAGAGTGCACAGT                 |
|                          | Probe  | FAM- CTGCACGAGCGCA-MGB<br>HEX- CTGCACGAGCACAT-MGB                       |
| <i>LMP7</i> rs2071543    | Primer | F: GCGACCCTCCACTCCTCA<br>R: GGACACTACAGTTTCTCTATGCGATCT                 |
|                          | Probe  | FAM- CCGACCTTCATTCC-MGB<br>HEX- CCGACCTGCATTC-MGB                       |
| <i>tapasin</i> rs9277972 | Primer | F: GTCTAGGTCCTTCAGGTAGAAGTAATCTTT<br>R: CTAAGTGAAATTGCATACTGTTTTACTCTAC |
|                          | Probe  | FAM-CCTATAAGGTTAACTGTTCT-MGB<br>HEX-CCTATAAGGTTAACTGTTCT-MGB            |
| <i>tapasin</i> rs1059288 | Primer | F: TGGGCCTTAGGTCCCTATGC<br>R: AAGTGATCGTGTGAGTCGTCGTT                   |

---

---

|                          |        |                              |
|--------------------------|--------|------------------------------|
| <i>tapasin</i> rs2282851 | Probe  | FAM-CAGACAGGCCGGTC-MGB       |
|                          |        | HEX-ACAGACAGGCCAGTC-MGB      |
|                          | Primer | F: CTCATTCTTGAATTATCTGCACAGT |
|                          |        | R: GCCCAGGAGTCAGAAGCTTTT     |
|                          | Probe  | FAM-CCACGTCTCAGCCTA-MGB      |
|                          |        | HEX-CCACGTCCCAGCCT-MGB       |

---
