# Supplementary material for: Association of Polymorphisms in HLA Antigen Presentation-Related Genes with the Outcomes of HCV Infection
Source: PubMed Central journal article supplement (PMC4395248; doi:10.1371/journal.pone.0123513), 2015-04-13
Supplement: pone.0123513.s004.pdf [file pone.0123513.s004.pdf]

**S2 Table. Comparison results of SNPs distribution in dominant, recessive, and additive models**

| SNPs                 | Location         | Dominant <sup>a</sup> |      | Recessive <sup>a</sup> |      | Additive <sup>a</sup> |      | Dominant <sup>b</sup> |      | Recessive <sup>b</sup> |      | Additive <sup>b</sup> |      |
|----------------------|------------------|-----------------------|------|------------------------|------|-----------------------|------|-----------------------|------|------------------------|------|-----------------------|------|
|                      |                  | <i>P</i> Value        | FDR* | <i>P</i> Value         | FDR* | <i>P</i> Value        | FDR* | <i>P</i> Value        | FDR* | <i>P</i> Value         | FDR* | <i>P</i> Value        | FDR* |
| <i>DMA</i> rs1050391 | intron(C>T)      | 8.52×10 <sup>-1</sup> | 0.98 | 2.95×10 <sup>-1</sup>  | 0.80 | 6.09×10 <sup>-1</sup> | 0.81 | 2.56×10 <sup>-1</sup> | 0.92 | 1.56×10 <sup>-1</sup>  | 0.77 | 6.66×10 <sup>-1</sup> | 0.99 |
| <i>DMA</i> rs1063478 | Missense(C>T)    | 4.58×10 <sup>-1</sup> | 0.77 | 8.15×10 <sup>-2</sup>  | 0.80 | 9.01×10 <sup>-1</sup> | 0.96 | 5.33×10 <sup>-1</sup> | 0.92 | 3.56×10 <sup>-1</sup>  | 0.77 | 8.64×10 <sup>-1</sup> | 0.99 |
| <i>DMA</i> rs3135029 | 5'near gene(C>A) | 8.64×10 <sup>-1</sup> | 0.98 | 1.33×10 <sup>-1</sup>  | 0.80 | 5.16×10 <sup>-1</sup> | 0.81 | 2.49×10 <sup>-1</sup> | 0.92 | 1.06×10 <sup>-1</sup>  | 0.77 | 7.26×10 <sup>-1</sup> | 0.99 |
| <i>DMB</i> rs23544   | intron(G>A)      | 9.83×10 <sup>-1</sup> | 0.98 | 7.03×10 <sup>-1</sup>  | 0.92 | 8.42×10 <sup>-1</sup> | 0.95 | 7.19×10 <sup>-1</sup> | 0.93 | 7.25×10 <sup>-1</sup>  | 0.93 | 6.64×10 <sup>-1</sup> | 0.99 |
| <i>DMB</i> rs2071556 | intron(C>A)      | 8.03×10 <sup>-1</sup> | 0.98 | 8.01×10 <sup>-1</sup>  | 0.92 | 9.60×10 <sup>-1</sup> | 0.99 | 4.65×10 <sup>-1</sup> | 0.92 | 4.26×10 <sup>-1</sup>  | 0.77 | 3.57×10 <sup>-1</sup> | 0.94 |
| <i>DOA</i> rs408036  | 3'UTR(G>A)       | 3.71×10 <sup>-1</sup> | 0.66 | 1.97×10 <sup>-1</sup>  | 0.80 | 1.91×10 <sup>-1</sup> | 0.42 | 3.26×10 <sup>-1</sup> | 0.92 | 1.97×10 <sup>-1</sup>  | 0.77 | 9.87×10 <sup>-1</sup> | 0.99 |
| <i>DOA</i> rs3128935 | 3'UTR(T>C)       | 5.95×10 <sup>-2</sup> | 0.34 | 5.54×10 <sup>-1</sup>  | 0.92 | 6.52×10 <sup>-2</sup> | 0.42 | 3.14×10 <sup>-2</sup> | 0.53 | 6.20×10 <sup>-2</sup>  | 0.77 | 1.17×10 <sup>-2</sup> | 0.26 |
| <i>DOA</i> rs3129304 | 3'UTR(A>G)       | 6.77×10 <sup>-1</sup> | 0.89 | 4.70×10 <sup>-1</sup>  | 0.92 | 8.32×10 <sup>-1</sup> | 0.95 | 6.37×10 <sup>-1</sup> | 0.93 | 9.32×10 <sup>-1</sup>  | 0.98 | 6.43×10 <sup>-1</sup> | 0.99 |
| <i>DOA</i> rs376892  | 3'UTR(C>T)       | 3.25×10 <sup>-1</sup> | 0.65 | 1.28×10 <sup>-1</sup>  | 0.80 | 1.61×10 <sup>-1</sup> | 0.42 | 7.65×10 <sup>-1</sup> | 0.93 | 7.51×10 <sup>-1</sup>  | 0.93 | 7.13×10 <sup>-1</sup> | 0.99 |
| <i>DOA</i> rs369150  | intron(G>A)      | 6.26×10 <sup>-1</sup> | 0.89 | 8.15×10 <sup>-1</sup>  | 0.92 | 6.43×10 <sup>-1</sup> | 0.81 | 8.20×10 <sup>-1</sup> | 0.93 | 2.25×10 <sup>-1</sup>  | 0.77 | 6.54×10 <sup>-1</sup> | 0.94 |
| <i>DOA</i> rs86567   | intron(A>C)      | 7.35×10 <sup>-1</sup> | 0.93 | 4.68×10 <sup>-1</sup>  | 0.92 | 8.59×10 <sup>-1</sup> | 0.95 | 7.19×10 <sup>-1</sup> | 0.93 | 2.76×10 <sup>-1</sup>  | 0.77 | 7.10×10 <sup>-1</sup> | 0.94 |
| <i>DOA</i> rs2284191 | intron(G>A)      | 9.66×10 <sup>-1</sup> | 0.98 | 1.66×10 <sup>-1</sup>  | 0.80 | 6.29×10 <sup>-1</sup> | 0.81 | 5.24×10 <sup>-1</sup> | 0.92 | 9.79×10 <sup>-1</sup>  | 0.98 | 8.95×10 <sup>-1</sup> | 0.99 |
| <i>DOA</i> rs6913008 | intron(C>T)      | 1.05×10 <sup>-1</sup> | 0.34 | 6.50×10 <sup>-1</sup>  | 0.92 | 1.33×10 <sup>-1</sup> | 0.42 | 8.99×10 <sup>-1</sup> | 0.93 | 3.50×10 <sup>-1</sup>  | 0.77 | 6.50×10 <sup>-1</sup> | 0.94 |
| <i>DOA</i> rs2582    | 3'UTR(C>A)       | 5.58×10 <sup>-2</sup> | 0.34 | 9.20×10 <sup>-1</sup>  | 0.95 | 1.05×10 <sup>-1</sup> | 0.42 | 6.58×10 <sup>-1</sup> | 0.93 | 5.93×10 <sup>-1</sup>  | 0.88 | 8.71×10 <sup>-1</sup> | 0.99 |
| <i>DOA</i> rs416622  | 3'UTR(G>A)       | 7.88×10 <sup>-2</sup> | 0.34 | 6.42×10 <sup>-1</sup>  | 0.92 | 1.29×10 <sup>-1</sup> | 0.42 | 7.96×10 <sup>-1</sup> | 0.93 | 7.42×10 <sup>-1</sup>  | 0.93 | 9.83×10 <sup>-1</sup> | 0.99 |
| <i>DOA</i> rs453779  | intron(C>T)      | 8.26×10 <sup>-2</sup> | 0.34 | 5.25×10 <sup>-1</sup>  | 0.92 | 1.15×10 <sup>-1</sup> | 0.42 | 5.98×10 <sup>-1</sup> | 0.92 | 8.99×10 <sup>-1</sup>  | 0.98 | 7.41×10 <sup>-1</sup> | 0.99 |
| <i>DOA</i> rs1044429 | 3'UTR(G>A)       | 8.91×10 <sup>-2</sup> | 0.34 | 7.36×10 <sup>-1</sup>  | 0.92 | 6.39×10 <sup>-1</sup> | 0.81 | 9.03×10 <sup>-1</sup> | 0.93 | 2.08×10 <sup>-1</sup>  | 0.77 | 2.24×10 <sup>-1</sup> | 0.99 |
| <i>DOB</i> rs2857111 | intron(A>G)      | 6.52×10 <sup>-1</sup> | 0.89 | 7.62×10 <sup>-1</sup>  | 0.92 | 6.26×10 <sup>-1</sup> | 0.81 | 2.48×10 <sup>-1</sup> | 0.92 | 6.16×10 <sup>-1</sup>  | 0.88 | 2.45×10 <sup>-1</sup> | 0.99 |
| <i>DOB</i> rs11244   | 3'UTR(C>T)       | 1.03×10 <sup>-1</sup> | 0.34 | 3.35×10 <sup>-1</sup>  | 0.80 | 8.43×10 <sup>-2</sup> | 0.42 | 9.33×10 <sup>-1</sup> | 0.93 | 3.10×10 <sup>-1</sup>  | 0.77 | 7.64×10 <sup>-1</sup> | 0.99 |
| <i>DOB</i> rs1383258 | intron(G>A)      | 2.76×10 <sup>-1</sup> | 0.63 | 1.08×10 <sup>-1</sup>  | 0.80 | 6.01×10 <sup>-1</sup> | 0.81 | 5.27×10 <sup>-1</sup> | 0.92 | 9.80×10 <sup>-1</sup>  | 0.98 | 4.57×10 <sup>-1</sup> | 0.99 |
| <i>DOB</i> rs2071469 | 5'UTR(A>G)       | 7.42×10 <sup>-4</sup> | 0.03 | 3.43×10 <sup>-4</sup>  | 0.01 | 5.19×10 <sup>-5</sup> | 0.00 | 9.17×10 <sup>-1</sup> | 0.93 | 4.14×10 <sup>-1</sup>  | 0.77 | 7.88×10 <sup>-1</sup> | 0.99 |
| <i>DOB</i> rs2071472 | intron(G>A)      | 5.27×10 <sup>-1</sup> | 0.78 | 3.44×10 <sup>-1</sup>  | 0.80 | 3.49×10 <sup>-1</sup> | 0.66 | 2.38×10 <sup>-1</sup> | 0.92 | 6.09×10 <sup>-1</sup>  | 0.88 | 5.69×10 <sup>-1</sup> | 0.94 |

|                          |                  |                       |      |                       |      |                       |      |                       |      |                       |      |                       |      |
|--------------------------|------------------|-----------------------|------|-----------------------|------|-----------------------|------|-----------------------|------|-----------------------|------|-----------------------|------|
| <i>DOB</i> rs7383287     | synonymous(A>G)  | $4.73 \times 10^{-1}$ | 0.77 | $9.69 \times 10^{-1}$ | 0.97 | $2.91 \times 10^{-1}$ | 0.58 | $3.97 \times 10^{-1}$ | 0.92 | ---                   | ---  | $3.97 \times 10^{-1}$ | 0.94 |
| <i>DOB</i> rs2856997     | intron(T>G)      | $1.11 \times 10^{-1}$ | 0.34 | $3.07 \times 10^{-1}$ | 0.80 | $1.06 \times 10^{-1}$ | 0.42 | $8.02 \times 10^{-1}$ | 0.93 | $1.60 \times 10^{-1}$ | 0.77 | $4.98 \times 10^{-1}$ | 0.94 |
| <i>DOB</i> rs2071471     | synonymous(C>T)  | $5.04 \times 10^{-1}$ | 0.78 | $8.41 \times 10^{-1}$ | 0.92 | $5.73 \times 10^{-1}$ | 0.81 | $5.12 \times 10^{-1}$ | 0.92 | $5.06 \times 10^{-1}$ | 0.84 | $6.71 \times 10^{-1}$ | 0.99 |
| <i>DOB</i> rs2071475     | intron(C>T)      | $2.43 \times 10^{-1}$ | 0.59 | $2.05 \times 10^{-1}$ | 0.80 | $1.43 \times 10^{-1}$ | 0.42 | $3.14 \times 10^{-1}$ | 0.92 | $8.55 \times 10^{-1}$ | 0.97 | $4.64 \times 10^{-1}$ | 0.94 |
| <i>DOB</i> rs2856995     | intron(T>A)      | $1.11 \times 10^{-1}$ | 0.34 | $7.39 \times 10^{-1}$ | 0.92 | $1.93 \times 10^{-1}$ | 0.42 | $5.39 \times 10^{-1}$ | 0.92 | $6.94 \times 10^{-2}$ | 0.77 | $1.68 \times 10^{-1}$ | 0.94 |
| <i>TAP1</i> rs1135216    | Missense(A>G)    | $9.40 \times 10^{-1}$ | 0.98 | $8.33 \times 10^{-1}$ | 0.92 | $9.96 \times 10^{-1}$ | 1.00 | $3.41 \times 10^{-1}$ | 0.92 | $4.42 \times 10^{-1}$ | 0.77 | $2.84 \times 10^{-1}$ | 0.99 |
| <i>TAP2</i> rs1800454    | Missense(G>A)    | $4.62 \times 10^{-3}$ | 0.08 | $3.52 \times 10^{-1}$ | 0.80 | $6.79 \times 10^{-3}$ | 0.12 | $2.49 \times 10^{-1}$ | 0.92 | $3.23 \times 10^{-1}$ | 0.77 | $5.29 \times 10^{-1}$ | 0.94 |
| <i>LMP2</i> rs17587      | Missense(G>A)    | $1.40 \times 10^{-1}$ | 0.40 | $3.38 \times 10^{-1}$ | 0.80 | $1.12 \times 10^{-1}$ | 0.42 | $4.03 \times 10^{-1}$ | 0.92 | $7.82 \times 10^{-1}$ | 0.93 | $4.21 \times 10^{-1}$ | 0.94 |
| <i>LMP7</i> rs2071543    | Missense(C>A)    | $3.70 \times 10^{-1}$ | 0.66 | $9.13 \times 10^{-1}$ | 0.95 | $4.18 \times 10^{-1}$ | 0.75 | $1.79 \times 10^{-1}$ | 0.92 | $1.21 \times 10^{-1}$ | 0.77 | $9.30 \times 10^{-2}$ | 0.94 |
| <i>tapasin</i> rs9277972 | intron(A>T)      | $1.65 \times 10^{-1}$ | 0.43 | $7.05 \times 10^{-1}$ | 0.92 | $1.74 \times 10^{-1}$ | 0.42 | $2.36 \times 10^{-2}$ | 0.53 | $3.44 \times 10^{-1}$ | 0.77 | $2.16 \times 10^{-2}$ | 0.26 |
| <i>tapasin</i> rs1059288 | 5'near gene(T>C) | $9.27 \times 10^{-1}$ | 0.98 | $6.49 \times 10^{-1}$ | 0.92 | $8.65 \times 10^{-1}$ | 0.95 | $2.82 \times 10^{-1}$ | 0.92 | $4.16 \times 10^{-1}$ | 0.77 | $2.41 \times 10^{-1}$ | 0.94 |
| <i>tapasin</i> rs2282851 | intron(C>T)      | $2.97 \times 10^{-1}$ | 0.63 | $2.59 \times 10^{-1}$ | 0.80 | $1.98 \times 10^{-1}$ | 0.42 | $5.66 \times 10^{-1}$ | 0.92 | $7.88 \times 10^{-1}$ | 0.93 | $5.67 \times 10^{-1}$ | 0.99 |

<sup>a</sup> HCV infected cases (including both resolvers and chronic cases) versus uninfected subjects; Logistic regression analyses adjusted for age, gender, and high-risk population.

<sup>b</sup> HCV chronic cases versus HCV resolvers; Logistic regression analyses adjusted for age, gender, high-risk population, and viral genotype.

\* FDR, false discovery rate; Multiple testing: using FDR.

<sup>#</sup> For rs7383287, GG homozygote was rarely seen in HCV-infected subjects, therefore the recessive model was not able to be used here.
