# Supplementary material for: Association of Polymorphisms in HLA Antigen Presentation-Related Genes with the Outcomes of HCV Infection
Source: PubMed Central journal article supplement (PMC4395248; doi:10.1371/journal.pone.0123513), 2015-04-13
Supplement: pone.0123513.s005.pdf [file pone.0123513.s005.pdf]

**S3 Table. Stratified analysis in subgroups**

|           |             | Uninfected (N) | Infected (N) | OR (95% CI)     | P value |
|-----------|-------------|----------------|--------------|-----------------|---------|
| rs1800454 |             |                |              |                 |         |
| GG/AG/AA  | HD patients | 445/130/15     | 116/45/7     |                 |         |
|           | IDUs        | 149/28/6       | 206/80/10    |                 |         |
| Dominant  | HD patients |                |              | 1.38(0.94-2.01) | 0.097   |
|           | IDUs        |                |              | 1.91(1.22-2.99) | 0.004   |
| Additive  | HD patients |                |              | 1.33(0.98-1.83) | 0.076   |
|           | IDUs        |                |              | 1.59(1.09-2.33) | 0.016   |
| rs2071469 |             |                |              |                 |         |
| AA/AG/GG  | HD patients | 280/195/115    | 62/72/34     |                 |         |
|           | IDUs        | 149/33/1       | 238/57/1     |                 |         |
| Dominant  | HD patients |                |              | 1.21(0.97-1.51) | 0.091   |
|           | IDUs        |                |              | 1.07(0.67-1.71) | 0.784   |
| Additive  | HD patients |                |              | 1.54(1.09-2.18) | 0.014   |
|           | IDUs        |                |              | 1.05(0.67-1.65) | 0.837   |
|           |             | Resolver (N)   | Chronic (N)  | OR (95% CI)     | P value |
| rs9277972 |             |                |              |                 |         |
| AA/AT/TT  | HD patients | 74/17/1        | 55/19/2      |                 |         |
|           | IDUs        | 132/21/1       | 109/31/2     |                 |         |
| Dominant  | HD patients |                |              | 1.47(0.71-3.03) | 0.299   |
|           | IDUs        |                |              | 1.82(1.00-3.30) | 0.049   |
| Additive  | HD patients |                |              | 1.40(0.72-2.75) | 0.322   |
|           | IDUs        |                |              | 1.74(1.02-3.04) | 0.047   |
| rs3128935 |             |                |              |                 |         |
| TT/CT/CC  | HD patients | 73/17/2        | 57/18/1      |                 |         |
|           | IDUs        | 102/46/6       | 117/25/0     |                 |         |
| Dominant  | HD patients |                |              | 1.28(0.62-2.64) | 0.503   |
|           | IDUs        |                |              | 0.42(0.24-0.73) | 0.002   |
| Additive  | HD patients |                |              | 1.17(0.61-2.23) | 0.632   |
|           | IDUs        |                |              | 0.41(0.25-0.68) | 0.001   |

HD, hemodialysis; IDUs, injecting drug users.
